# Supplementary material
Source: PubMed Central journal article supplement (PMC2694970)
Supplement: mmc1.pdf [file mmc1.pdf]

**Supplemental Data**

**Mitochondrial Haplogroup U5b3:**

**A Distant Echo of the Epipaleolithic in Italy**

**and the Legacy of the Early Sardinians**

Maria Pala, Alessandro Achilli, Anna Olivieri, Baharak Hooshar Kashani, Ugo A. Perego, Daria Sanna, Ene Metspalu, Kristiina Tambets, Erika Tamm, Matteo Accetturo, Valeria Carossa, Hovirag Lancioni, Fausto Panara, Bettina Zimmermann, Gabriela Huber, Nadia Al-Zahery, Francesca Brisighelli, Scott R. Woodward, Paolo Francalacci, Walther Parson, Antonio Salas, Doron M. Behar, Richard Villems, Ornella Semino, Hans-Jürgen Bandelt, and Antonio Torroni

**Table S1. List of U5b3 Complete Sequences Included in Figure 1**

| Sequence ID <sup>a</sup> | Haplogroup | Geographic Origin         | GenBank ID | References |
|--------------------------|------------|---------------------------|------------|------------|
| 1                        | U5b3       | Sicily                    | GQ129143   | [1]        |
| 2 <sup>b</sup>           | U5b3       | Southern France           | GQ129144   | [1]        |
| 3                        | U5b3       | Bosnia                    | GQ129145   | [1]        |
| 4                        | U5b3       | Croatia                   | GQ129146   | [1]        |
| 5                        | U5b3       | Spain                     | GQ129147   | [1]        |
| 6                        | U5b3       | Piedmont - Northern Italy | GQ129148   | [1]        |
| 7                        | U5b3a1a    | Sardinia                  | GQ129149   | [1]        |
| 8                        | U5b3a1a    | Sardinia                  | GQ129150   | [1]        |
| 9 <sup>c</sup>           | U5b3a1a    | Sardinia                  | GQ129151   | [1]        |
| 10                       | U5b3a1a    | Sardinia                  | DQ523655   | [2]        |
| 11                       | U5b3a1a    | Sardinia                  | DQ523658   | [2]        |
| 12                       | U5b3a1a    | Sardinia                  | DQ523664   | [2]        |
| 13                       | U5b3a1a    | Sardinia                  | GQ129152   | [1]        |
| 14                       | U5b3a1a    | Sardinia                  | GQ129153   | [1]        |
| 15                       | U5b3a1a    | Sardinia                  | DQ523628   | [2]        |
| 16                       | U5b3a1a    | Sardinia                  | DQ523644   | [2]        |
| 17                       | U5b3a1a    | Sardinia                  | DQ523669   | [2]        |
| 18                       | U5b3a1a    | Sardinia                  | GQ129154   | [1]        |
| 19                       | U5b3a1a    | Sardinia                  | GQ129155   | [1]        |
| 20                       | U5b3a1a    | Sardinia                  | EU597508   | [3]        |
| 21                       | U5b3a1a    | Sardinia                  | GQ129156   | [1]        |
| 22                       | U5b3a1a    | Undefined - Italy         | AF346988   | [4]        |
| 23                       | U5b3a1a    | Sardinia                  | DQ523624   | [2]        |
| 24 <sup>b</sup>          | U5b3a1b    | Southern France           | GQ129157   | [1]        |
| 25                       | U5b3a1b    | Delaware - USA            | GQ129158   | [1]        |
| 26                       | U5b3a2     | Marche - Central Italy    | GQ129159   | [1]        |

|                 |        |                        |          |     |
|-----------------|--------|------------------------|----------|-----|
| 27              | U5b3a2 | Morocco                | GQ129160 | [1] |
| 28              | U5b3a2 | Marche - Central Italy | GQ129161 | [1] |
| 29              | U5b3a2 | Marche - Central Italy | GQ129162 | [1] |
| 30              | U5b3a2 | England - UK           | EU926618 | [1] |
| 31              | U5b3a2 | Pennsylvania - USA     | GQ129163 | [1] |
| 32              | U5b3a2 | Estonia                | GQ129164 | [1] |
| 33              | U5b3b  | Crete - Greece         | GQ129165 | [1] |
| 34              | U5b3b  | Spain                  | GQ129166 | [1] |
| 35              | U5b3b  | Bohemia - Czech Rep.   | GQ129167 | [1] |
| 36              | U5b3b  | Marche - Central Italy | GQ129168 | [1] |
| 37              | U5b3b  | England - UK           | EU130681 | [1] |
| 38              | U5b3b  | Palatinate - Germany   | GQ129169 | [1] |
| 39              | U5b3c  | Sardinia               | GQ129170 | [1] |
| 40              | U5b3c  | Cantabria - Spain      | GQ129171 | [1] |
| 41              | U5b3c  | Sicily                 | GQ129172 | [1] |
| 42              | U5b3d  | Southern Spain         | GQ129173 | [1] |
| 43              | U5b3d  | Iraq                   | GQ129174 | [1] |
| 44              | U5b3e  | Scotland - UK          | GQ129175 | [1] |
| 45 <sup>d</sup> | U5b3e  | Southern Germany       | GQ129176 | [1] |
| 46              | U5b3e  | Poland                 | GQ129177 | [1] |
| 47              | U5b3e  | Bulgaria               | GQ129178 | [1] |
| 48              | U5b3f  | USA                    | GQ129179 | [1] |
| 49              | U5b3f  | Latium - Central Italy | GQ129180 | [1] |
| 50              | U5b3f  | Latium - Central Italy | GQ129181 | [1] |
| 51              | U5b3f  | Catalonia - Spain      | GQ129182 | [1] |
| 52              | U5b3f  | Latium - Central Italy | GQ129183 | [1] |

<sup>a</sup> ID numbers correspond to the numbers in Figure 1.

<sup>b</sup> The control-region sequence of this mtDNA was previously published.<sup>5</sup>

<sup>c</sup> The control-region sequence of this mtDNA was previously published.<sup>6</sup>

<sup>d</sup> The control-region sequence of this mtDNA was previously published.<sup>7</sup>

**Table S2. Population Distribution of Haplogroup U5b3**

| Region, Population/Country   | Sample size | U5b3 <sup>a</sup>  |      | References              |
|------------------------------|-------------|--------------------|------|-------------------------|
|                              |             | Number of subjects | %    |                         |
| <i>Western Europe:</i>       |             |                    |      |                         |
| Austria                      | 374         | 0                  | -    | [8, 9]                  |
| Balearic Islands             | 256         | 4                  | 1.56 | [10, 11]                |
| Basques                      | 237         | 0                  | -    | [5, 6, 12, 13]          |
| Denmark                      | 247         | 0                  | -    | [1, 6]                  |
| England                      | 335         | 2                  | 0.60 | [1, 6, 14]              |
| Finland                      | 405         | 0                  | -    | [1, 6, 15, 16]          |
| France                       | 234         | 1                  | 0.43 | [1, 5, 6, 17]           |
| France Centre-South          | 240         | 2                  | 0.83 | [5, 18]                 |
| France Centre-West           | 124         | 0                  | -    | [5]                     |
| France North & Belgium       | 267         | 1                  | 0.37 | [5, 6, 19]              |
| France-Corse                 | 99          | 0                  | -    | [11, 20]                |
| France-Normandie-Bretagne    | 383         | 0                  | -    | [5, 18]                 |
| Germany Centre               | 115         | 0                  | -    | [1, 21, 22]             |
| Germany North                | 426         | 0                  | -    | [21, 23-25]             |
| Germany South                | 356         | 1                  | 0.28 | [7, 21, 26]             |
| Iceland                      | 457         | 2                  | 0.44 | [6, 27]                 |
| Ireland                      | 300         | 1                  | 0.33 | [28]                    |
| Norway                       | 554         | 1                  | 0.18 | [6, 14]                 |
| Portugal Centre              | 160         | 0                  | -    | [29, 30]                |
| Portugal North               | 184         | 2                  | 1.09 | [29, 30]                |
| Portugal South               | 196         | 0                  | -    | [29, 30]                |
| Saami                        | 255         | 0                  | -    | [1, 15, 31, 32]         |
| Scotland                     | 1199        | 3                  | 0.25 | [14]                    |
| Spain                        | 554         | 3                  | 0.54 | [1, 33-36]              |
| Spain North-East             | 562         | 2                  | 0.36 | [1, 13, 37]             |
| Spain North-West             | 439         | 1                  | 0.23 | [1, 13, 30, 38, 39]     |
| Spain South                  | 641         | 5                  | 0.78 | [1, 10, 11, 13, 34, 35] |
| Sweden                       | 512         | 0                  | -    | [1, 6]                  |
| Switzerland                  | 434         | 1                  | 0.23 | [1, 40, 41]             |
| Wales                        | 92          | 0                  | -    | [21]                    |
| <i>Western Europe-Italy:</i> |             |                    |      |                         |
| Apulia Calabria              | 228         | 0                  | -    | [1]                     |
| Campania                     | 314         | 0                  | -    | [1]                     |
| Latium                       | 736         | 6                  | 0.82 | [1, 42, 43]             |
| Lombardy                     | 215         | 0                  | -    | [1, 43]                 |
| Marche                       | 1125        | 8                  | 0.71 | [1, 43]                 |
| Piedmont                     | 1006        | 5                  | 0.50 | [1, 43]                 |
| Sardinia                     | 1224        | 47                 | 3.84 | [1, 6, 11, 44]          |

**The American Journal of Human Genetics, Volume 84**

|                        |      |   |      |                     |
|------------------------|------|---|------|---------------------|
| Sicily                 | 699  | 3 | 0.43 | [1, 6, 45]          |
| South Tyrol            | 540  | 0 | -    | [46, 47]            |
| Tuscany                | 483  | 0 | -    | [1, 11, 43, 48, 49] |
| Umbria                 | 202  | 0 | -    | [1]                 |
| <i>Eastern Europe:</i> |      |   |      |                     |
| Albania                | 242  | 0 | -    | [1, 6]              |
| Bashkirs               | 332  | 0 | -    | [1]                 |
| Bosnia                 | 512  | 2 | 0.39 | [1, 50]             |
| Bulgaria               | 268  | 1 | 0.37 | [1, 6]              |
| Byelorussia            | 351  | 0 | -    | [1]                 |
| Croatia                | 1405 | 4 | 0.28 | [1, 42]             |
| Czech Republic         | 83   | 0 | -    | [6]                 |
| Estonia                | 646  | 1 | 0.15 | [6, 51, 52]         |
| Greece                 | 735  | 0 | -    | [1, 6, 53, 54]      |
| Greece-Crete           | 395  | 1 | 0.25 | [1, 53]             |
| Greece-Lemnos          | 60   | 0 | -    | [1]                 |
| Hungary                | 647  | 2 | 0.31 | [1, 55, 56]         |
| Karelians              | 176  | 0 | -    | [1]                 |
| Macedonia              | 162  | 0 | -    | [1]                 |
| Montenegro             | 138  | 1 | 0.72 | [1]                 |
| Poland                 | 572  | 1 | 0.17 | [1, 6, 57]          |
| Rumania                | 453  | 0 | -    | [1, 6]              |
| Russia                 | 1879 | 0 | -    | [1, 6, 57-59]       |
| Serbia                 | 126  | 0 | -    | [1]                 |
| Slovakia               | 885  | 2 | 0.23 | [1, 60, 61]         |
| Slovenia               | 104  | 0 | -    | [50]                |
| Ukraine                | 1142 | 0 | -    | [1, 59]             |
| <i>Caucasus:</i>       |      |   |      |                     |
| Armenia                | 191  | 1 | 0.52 | [6]                 |
| Azerbaijan             | 48   | 0 | -    | [6]                 |
| Caucasus North         | 356  | 0 | -    | [6, 62, 63]         |
| Georgia                | 113  | 0 | -    | [62, 64, 65]        |
| <i>Middle East:</i>    |      |   |      |                     |
| Iran                   | 1311 | 0 | -    | [1, 63, 66]         |
| Iraq                   | 261  | 1 | 0.38 | [1, 6]              |
| Jordan                 | 146  | 0 | -    | [6]                 |
| Kurds                  | 82   | 0 | -    | [6, 64]             |
| Pakistan               | 109  | 0 | -    | [62, 67]            |
| Palestinians           | 227  | 0 | -    | [6, 68]             |
| Syria                  | 118  | 0 | -    | [6, 53]             |
| Turkey                 | 340  | 0 | -    | [6, 62, 69]         |
| <i>Africa:</i>         |      |   |      |                     |
| Algeria                | 125  | 0 | -    | [13, 35]            |
| Egypt                  | 525  | 0 | -    | [1, 70, 71]         |

**The American Journal of Human Genetics, Volume 84**

|                     |              |            |      |                     |
|---------------------|--------------|------------|------|---------------------|
| Libya               | 129          | 0          | -    | [1]                 |
| Mauritania-Morocco  | 999          | 2          | 0.20 | [1, 11, 35, 71, 72] |
| Senegal             | 240          | 0          | -    | [72, 73]            |
| Tunisia             | 724          | 0          | -    | [1, 35, 74]         |
| <b><i>TOTAL</i></b> | <b>34766</b> | <b>120</b> |      |                     |

<sup>a</sup> For many of the published datasets only control-region data were available (from np 16030 to np 16365). In these cases, U5 mtDNAs were affiliated within U5b3 when lacking 16189 or 16256 and harbouring 16304 (with the exception of U5b3a1a clade in which 16304 is reverted).

**Supplemental References**

1. This Study
2. Fraumene, C., Belle, E.M.S., Castri, L., Sanna, S., Mancosu, G., Cosso, M., Marras, F., Barbujani, G., Pirastu, M., Angius, A. (2006). High resolution analysis and phylogenetic network construction using complete mtDNA sequences in Sardinian genetic isolates. *Mol. Biol. Evol.* 23, 2101-2111.
3. Hartmann, A., Thieme, M., Nanduri, L.K., Stempf, T., Moehle, C., Kivisild, T., Oefner, P.J. (2009). Validation of microarray-based resequencing of 93 worldwide mitochondrial genomes. *Hum. Mutat.* 30, 115-122.
4. Ingman, M., Kaessmann, H., Pääbo, S., Gyllensten, U. (2000). Mitochondrial genome variation and the origin of modern humans. *Nature* 408, 708-713.
5. Richard, C., Pennarun, E., Kivisild, T., Tambets, K., Tolk, H.V., Metspalu, E., Reidla, M., Chevalier, S., Giraudet, S., Baracé Lauc, L., et al. (2007). An mtDNA perspective of French genetic variation. *Ann. Hum. Biol.* 34, 68-79.
6. Richards, M., Macaulay, V., Hickey, E., Vega, E., Sykes, B., Guida, V., Rengo, C., Sellitto, D., Cruciani, F., Kivisild, T., et al. (2000). Tracing European founder lineages in the Near Eastern mtDNA pool. *Am. J. Hum. Genet.* 67, 1251-1276.
7. Brandstätter, A., Klein, R., Duftner, N., Wiegand, P., Parson, W. (2006). Application of a quasi-median network analysis for the visualization of character conflicts to a population sample of mitochondrial DNA control region sequences from southern Germany (Ulm). *Int. J. Legal. Med.* 120, 310-314.
8. Parson, W., Parsons, T.J., Scheithauer, R., Holland, M.M. (1998). Population data for 101 Austrian Caucasian mitochondrial DNA d-loop sequences: application of mtDNA sequence analysis to a forensic case. *Int. J. Legal. Med.* 111, 124-132.
9. Brandstätter, A., Niederstätter, H., Pavlic, M., Grubwieser, P., Parson, W. (2007). Generating population data for the EMPOP database - an overview of the mtDNA

- sequencing and data evaluation processes considering 273 Austrian control region sequences as example. *Forensic. Sci. Int.* *166*, 164-175.
10. Picornell, A., Gómez-Barbeito, L., Tomàs, C., Castro, J.A., Ramon, M.M. (2005). Mitochondrial DNA HVRI variation in Balearic populations. *Am. J. Phys. Anthropol.* *128*, 119-130.
  11. Falchi, A., Giovannoni, L., Calo, C.M., Piras, I.S., Moral, P., Paoli, G., Vona, G., Varesi, L. (2006). Genetic history of some western Mediterranean human isolates through mtDNA HVR1 polymorphisms. *J. Hum. Genet.* *51*, 9-14.
  12. Bertranpetit, J., Sala, J., Calafell, F., Underhill, P.A., Moral, P., Comas, D. (1995). Human mitochondrial DNA variation and the origin of Basques. *Ann. Hum. Genet.* *59*, 63-81.
  13. Côté-Real, H.B., Macaulay, V.A., Richards, M.B., Hariti, G., Issad, M.S., Cambon-Thomsen, A., Papiha, S., Bertranpetit, J., Sykes, B.C. (1996). Genetic diversity in the Iberian Peninsula determined from mitochondrial sequence analysis. *Ann. Hum. Genet.* *60*, 331-350.
  14. Helgason, A., Hickey, E., Goodacre, S., Bosnes, V., Stefánsson, K., Ward, R., Sykes, B. (2001). MtDNA and the islands of the North Atlantic: estimating the proportions of Norse and Gaelic ancestry. *Am. J. Hum. Genet.* *68*, 723-737.
  15. Lahermo, P., Sajantila, A., Sistonen, P., Lukka, M., Aula, P., Peltonen, L., Savontaus, M.L. (1996). The genetic relationship between the Finns and the Finnish Saami (Lapps): analysis of nuclear DNA and mtDNA. *Am. J. Hum. Genet.* *58*, 1309-1322.
  16. Hedman, M., Brandstätter, A., Pimenoff, V., Sistonen, P., Palo, J.U., Parson, W., Sajantila, A. (2007). Finnish mitochondrial DNA HVS-I and HVS-II population data. *Forensic Sci. Int.* *172*, 171-178.
  17. Rousselet, F., Mangin, P. (1998). Mitochondrial DNA polymorphisms: a study of 50 French Caucasian individuals and application to forensic casework. *Int. J. Legal. Med.* *111*, 292-298.

18. Dubut, V., Chollet, L., Murail, P., Cartault, F., Béraud-Colomb, E., Serre, M., Mogentale-Profizi, N. (2004). MtDNA polymorphisms in five French groups: importance of regional sampling. *Eur. J. Hum. Genet.* *12*, 293-300.
19. Decorte, R., Jehaes, E., Xiao, F.X. and Cassiman, J.J. (1996). Genetic analysis of single hair shafts by automated sequence analysis of the mitochondrial d-loop region. In *Advances in Forensic Haemogenetics 6*, A. Carracedo, B. Brinkmann, and W. Bär, ed. (Berlin, Germany: Springer-Verlag) pp. 17-19.
20. Varesi, L., Memmi, M., Cristofari, M.C., Mameli, G.E., Calò, C.M., Vona, G. (2000). Mitochondrial control-region sequence variation in the Corsican population, France. *Am. J. Hum. Biol.* *12*, 339-351.
21. Richards, M., Côrte-Real, H., Forster, P., Macaulay, V., Wilkinson-Herbots, H., Demaine, A., Papiha, S., Hedges, R., Bandelt, H.-J., Sykes, B. (1996). Paleolithic and neolithic lineages in the European mitochondrial gene pool. *Am. J. Hum. Genet.* *59*, 185-203.
22. Hofmann, S., Jaksch, M., Bezold, R., Mertens, S., Aholt, S., Paprotta, A., Gerbitz, K.D. (1997). Population genetics and disease susceptibility: characterization of central European haplogroups by mtDNA gene mutations, correlation with D loop variants and association with disease. *Hum. Mol. Genet.* *6*, 1835-1846.
23. Baasner, A., Schäfer, C., Junge, A., Madea, B. (1998). Polymorphic sites in human mitochondrial DNA control region sequences: population data and maternal inheritance. *Forensic Sci. Int.* *98*, 169-178.
24. Pfeiffer, H., Brinkmann, B., Hühne, J., Rolf, B., Morris, A.A., Steighner, R., Holland, M.M., Forster, P. (1999). Expanding the forensic German mitochondrial DNA control region database: genetic diversity as a function of sample size and microgeography. *Int. J. Legal. Med.* *112*, 291-298.
25. Tetzlaff, S., Brandstätter, A., Wegener, R., Parson, W., Weirich, V. (2007). Mitochondrial DNA population data of HVS-I and HVS-II sequences from a northeast German sample.



- Forensic Sci. Int. *172*, 218-224.
26. Lutz, S., Weisser, H.J., Heizmann, J., Pollak, S. (1998). Location and frequency of polymorphic positions in the mtDNA control region of individuals from Germany. *Int. J. Legal. Med.* *111*, 67-77.
27. Helgason, A., Sigurðardóttir, S., Gulcher, J.R., Ward, R., Stefánsson, K. (2000). MtDNA and the origin of the Icelanders: deciphering signals of recent population history. *Am. J. Hum. Genet.* *66*, 999-1016.
28. McEvoy, B., Richards, M., Forster, P., Bradley, D.G. (2004). The Longue Durée of genetic ancestry: multiple genetic marker systems and Celtic origins on the Atlantic facade of Europe. *Am. J. Hum. Genet.* *75*, 693-702.
29. Pereira, L., Prata, M.J., Amorim, A. (2000). Diversity of mtDNA lineages in Portugal: not a genetic edge of European variation. *Ann. Hum. Genet.* *64*, 491-506.
30. González, A.M., Brehm, A., Pérez, J.A., Maca-Meyer, N., Flores, C., Cabrera, V.M. (2003). Mitochondrial DNA affinities at the Atlantic fringe of Europe. *Am. J. Phys. Anthropol.* *120*, 391-404.
31. Sajantila, A., Lahermo, P., Anttinen, T., Lukka, M., Sistonen, P., Savontaus, M.L., Aula, P., Beckman, L., Tranebjaerg, L., Gedde-Dahl, T., et al. (1995). Genes and languages in Europe: an analysis of mitochondrial lineages. *Genome Res.* *5*, 42-52.
32. Delghandi, M., Utsi, E., Krauss, S. (1998). Saami mitochondrial DNA reveals deep maternal lineage clusters. *Hum. Hered.* *48*, 108-114.
33. Pinto, F., González, A.M., Hernández, M., Larruga, J.M., Cabrera, V.M. (1996). Genetic relationship between the Canary Islanders and their African and Spanish ancestors inferred from mitochondrial DNA sequences. *Ann. Hum. Genet.* *60*, 321-330.
34. Larruga, J.M., Díez, F., Pinto, F.M., Flores, C., González, A.M. (2001). Mitochondrial DNA characterisation of European isolates: the Maragatos from Spain. *Eur. J. Hum. Genet.* *9*, 708-716.

35. Plaza, S., Calafell, F., Helal, A., Bouzerna, N., Lefranc, G., Bertranpetit, J., Comas, D. (2003). Joining the pillars of Hercules: mtDNA sequences show multidirectional gene flow in the western Mediterranean. *Ann. Hum. Genet.* *67*, 312-328.
36. Database Comisaría General Policía Científica de Madrid (<http://www.policia.es/cgpc/index.htm>).
37. Crespillo, M., Luque, J.A., Paredes, M., Fernández, R., Ramírez, E., Valverde, J.L. (2000). Mitochondrial DNA sequences for 118 individuals from northeastern Spain. *Int. J. Legal Med.* *114*, 130-132.
38. Salas, A., Comas, D., Lareu, M.V., Bertranpetit, J., Carracedo, A. (1998). MtDNA analysis of the Galician population: a genetic edge of European variation. *Eur. J. Hum. Genet.* *6*, 365-375.
39. Maca-Meyer, N., Sánchez-Velasco, P., Flores, C., Larruga, J.M., González, A.M., Oterino, A., Leyva-Cobián, F. (2003). Y chromosome and mitochondrial DNA characterization of Pasiegos, a human isolate from Cantabria (Spain). *Ann. Hum. Genet.* *67*, 329-339.
40. Pult, I., Sajantila, A., Simanainen, J., Georgiev, O., Schaffner, W., Pääbo, S. (1994). Mitochondrial DNA sequences from Switzerland reveal striking homogeneity of European populations. *Biol. Chem. Hoppe. Seyler.* *375*, 837-840.
41. Dimo-Simonin, N., Grange, F., Taroni, F., Brandt-Casadevall, C., Mangin, P. (2000). Forensic evaluation of mtDNA in a population from south west Switzerland. *Int. J. Legal Med.* *113*, 89-97.
42. Babalini, C., Martínez-Labarga, C., Tolk, H.V., Kivisild, T., Giampaolo, R., Tarsi, T., Contini, I., Barac L., Janićijević, B., Martinović Klarić, I., et al. (2005). The population history of the Croatian linguistic minority of Molise (southern Italy): a maternal view. *Eur. J. Hum. Genet.* *13*, 902-912.
43. Turchi, C., Buscemi, L., Previderè, C., Grignani, P., Brandstätter, A., Achilli, A., Parson, W., Tagliabracci, A., Ge.F.I. Group. (2008). Italian mitochondrial DNA database: results of

- a collaborative exercise and proficiency testing. *Int. J. Legal. Med.* *122*, 199-204.
44. Di Rienzo, A., Wilson, A.C. (1991). Branching pattern in the evolutionary tree for human mitochondrial DNA. *Proc. Natl. Acad. Sci. USA* *88*, 1597-1601.
45. Vona, G., Ghiani, M.E., Calò, C.M., Vacca, L., Memmi, M., Varesi, L. (2001). Mitochondrial DNA sequence analysis in Sicily. *Am. J. Hum. Biol.* *13*, 576-589.
46. Pichler, I., Mueller, J.C., Stefanov, S.A., De Grandi, A., Volpato, C.B., Pinggera, G.K., Mayr, A., Ogriseg, M., Ploner, F., Meitinger, T., et al. (2006). Genetic structure in contemporary south Tyrolean isolated populations revealed by analysis of Y-chromosome, mtDNA, and Alu polymorphisms. *Hum. Biol.* *78*, 441-464.
47. Thomas, M.G., Barnes, I., Weale, M.E., Jones, A.L., Forster, P., Bradman, N., Pramstaller, P.P. (2008). New genetic evidence supports isolation and drift in the Ladin communities of the South Tyrolean Alps but not an ancient origin in the Middle East. *Eur. J. Hum. Genet.* *16*, 124-134.
48. Francalacci, P., Bertranpetit, J., Calafell, F., Underhill, P.A. (1996). Sequence diversity of the control region of mitochondrial DNA in Tuscany and its implications for the peopling of Europe. *Am. J. Phys. Anthropol.* *100*, 443-460.
49. Achilli, A., Olivieri, A., Pala, M., Metspalu, E., Fornarino, S., Battaglia, V., Accetturo, M., Kutuev, I., Khusnutdinova, E., Pennarun, E., et al. (2007). Mitochondrial DNA variation of modern Tuscans supports the near eastern origin of Etruscans. *Am. J. Hum. Genet.* *80*, 759-768.
50. Malyarchuk, B.A., Grzybowski, T., Derenko, M.V., Czarny, J., Drobnic, K., Miścicka-Sliwka, D. (2003). Mitochondrial DNA variability in Bosnians and Slovenians. *Ann. Hum. Genet.* *67*, 412-425.
51. Tambets, K., Rootsi, S., Kivisild, T., Help, H., Serk, P., Loogväli, E.L., Tolk, H.V., Reidla, M., Metspalu, E., Pliss, L., et al. (2004). The western and eastern roots of the Saami—the story of genetic "outliers" told by mitochondrial DNA and Y chromosomes. *Am. J. Hum.*

- Genet. 74, 661-682.
52. Pliss, L., Tambets, K., Loogväli, E.L., Pronina, N., Lazdins, M., Krumina, A., Baumanis, V., Villems, R. (2006). Mitochondrial DNA portrait of Latvians: towards the understanding of the genetic structure of Baltic-speaking populations. *Ann. Hum. Genet.* 70, 439-458.
53. Vernesi, C., Di Benedetto, G., Caramelli, D., Secchieri, E., Simoni, L., Katti, E., Malaspina, P., Novelletto, A., Marin, V.T., Barbujani, G. (2001). Genetic characterization of the body attributed to the evangelist Luke. *Proc. Natl. Acad. Sci. USA* 98, 13460-13463.
54. Irwin, J., Saunier, J., Strouss, K., Paintner, C., Diegoli, T., Sturk, K., Kovatsi, L., Brandstätter, A., Cariolou, M.A., Parson, W., Parsons, T.J. (2008). Mitochondrial control region sequences from northern Greece and Greek Cypriots. *Int. J. Legal. Med.* 122, 87-89.
55. Brandstätter, A., Egyed, B., Zimmermann, B., Duftner, N., Padar, Z., Parson, W. (2007). Migration rates and genetic structure of two Hungarian ethnic groups in Transylvania, Romania. *Ann. Hum. Genet.* 71, 791-803.
56. Irwin, J., Egyed, B., Saunier, J., Szamosi, G., O'Callaghan, J., Padar, Z., Parsons, T.J. (2007). Hungarian mtDNA population databases from Budapest and the Baranya county Roma. *Int. J. Legal. Med.* 121, 377-383.
57. Malyarchuk, B.A., Grzybowski, T., Derenko, M.V., Czarny, J., Woźniak, M., Miścicka-Sliwka, D. (2002). Mitochondrial DNA variability in Poles and Russians. *Ann. Hum. Genet.* 66, 261-283.
58. Orekhov, V., Poltoraus, A., Zhivotovsky, L.A., Spitsyn, V., Ivanov, P., Yankovsky, N. (1999). Mitochondrial DNA sequence diversity in Russians. *FEBS Lett.* 445, 197-201.
59. Malyarchuk, B.A., Derenko, M.V. (2001). Mitochondrial DNA variability in Russians and Ukrainians: implication to the origin of the Eastern Slavs. *Ann. Hum. Genet.* 65, 63-78.
60. Metspalu, E., Kivisild, T., Kaldma, K., Reidla, M., Villems, R. (1998). Genbank direct submission.
61. Lehocký, I., Baldovic, M., Kádasi, L., Metspalu, E. (2008). A database of mitochondrial

- DNA hypervariable regions I and II sequences of individuals from Slovakia. *Forensic Sci. Int. Genet.* 2, e53-59.
62. Quintana-Murci, L., Chaix, R., Wells, R.S., Behar, D.M., Sayar, H., Scozzari, R., Rengo, C., Al-Zahery, N., Semino, O., Santachiara-Benerecetti, A.S., et al. (2004). Where west meets east, the complex mtDNA landscape of the southwest and Central Asian corridor. *Am. J. Hum. Genet.* 74, 827-845.
63. Derenko, M., Malyarchuk, B., Grzybowski, T., Denisova, G., Dambueva, I., Perkova, M., Dorzhu, C., Luzina, F., Lee, H.K., Vanecek, T., et al. (2007). Phylogeographic analysis of mitochondrial DNA in northern Asian populations. *Am. J. Hum. Genet.* 81, 1025-1041.
64. Comas, D., Calafell, F., Bendukidze, N., Fañanás, L., Bertranpetit, J. (2000). Georgian and kurd mtDNA sequence analysis shows a lack of correlation between languages and female genetic lineages. *Am. J. Phys. Anthropol.* 112, 5-16.
65. Alfonso-Sánchez, M.A., Martínez-Bouzas, C., Castro, A., Peña, J.A., Fernández-Fernández, I., Herrera, R.J., de Pancorbo, M.M. (2006). Sequence polymorphisms of the mtDNA control region in a human isolate: the Georgians from Swanetia. *J. Hum. Genet.* 51, 429-439.
66. Metspalu, M., Kivisild, T., Metspalu, E., Parik, J., Hudjashov, G., Kaldma, K., Serk, P., Karmin, M., Behar, D.M., Gilbert, M.T., et al. (2004). Most of the extant mtDNA boundaries in south and southwest Asia were likely shaped during the initial settlement of Eurasia by anatomically modern humans. *BMC Genet.* 5, 26.
67. Kivisild, T., Bamshad, M.J., Kaldma, K., Metspalu, M., Metspalu, E., Reidla, M., Laos, S., Parik, J., Watkins, W.S., Dixon, M.E., et al. (1999). Deep common ancestry of Indian and western-Eurasian mitochondrial DNA lineages. *Curr. Biol.* 9, 1331-1334.
68. Behar, D.M., Metspalu, E., Kivisild, T., Rosset, S., Tzur, S., Hadid, Y., Yudkovsky, G., Rosengarten, D., Pereira, L., Amorim, A., et al. (2008). Counting the founders: the matrilineal genetic ancestry of the Jewish Diaspora. *PLoS ONE* 3, e2062.

69. Di Benedetto, G., Ergüven, A., Stenico, M., Castri, L., Bertorelle, G., Togan, I., Barbujani, G. (2001). DNA diversity and population admixture in Anatolia. *Am. J. Phys. Anthropol.* *115*, 144-156.
70. Stevanovitch, A., Gilles, A., Bouzaid, E., Kefi, R., Paris, F., Gayraud, R.P., Spadoni, J.L., El-Chenawi, F., Béraud-Colomb, E. (2004). Mitochondrial DNA sequence diversity in a sedentary population from Egypt. *Ann. Hum. Genet.* *68*, 23-39.
71. Coudray, C., Olivieri, A., Achilli, A., Pala, M., Melhaoui, M., Cherkaoui, M., El-Chennawi, F., Kossmann, M., Torroni, A., Dugoujon, J.M. (2009). The complex and diversified mitochondrial gene pool of Berber populations. *Ann. Hum. Genet.* *73*, 196-214.
72. Rando, J.C., Pinto, F., González, A.M., Hernández, M., Larruga, J.M., Cabrera, V.M., Bandelt, H.-J. (1998). Mitochondrial DNA analysis of northwest African populations reveals genetic exchanges with European, near-eastern, and sub-Saharan populations. *Ann. Hum. Genet.* *62*, 531-550.
73. Graven, L., Passarino, G., Semino, O., Boursot, P., Santachiara-Benerecetti, A.S., Langaney, A., Excoffier, L. (1995). Evolutionary correlation between control region sequence and restriction polymorphisms in the mitochondrial genome of a large Senegalese Mandenka sample. *Mol. Biol. Evol.* *12*, 334-345.
74. Fadhlaoui-Zid, K., Plaza, S., Calafell, F., Ben Amor, M., Comas, D., Bennamar El gaaied, A (2004). Mitochondrial DNA heterogeneity in Tunisian Berbers. *Ann. Hum. Genet.* *68*, 222-233.
